# Supplementary material
Source: publisher figshare collection journal article supplement (https://tandf.figshare.com/ndownloader/files/18057245)
Supplement: Supplementary file 1 [file 18057245]

**Supplementary information**

**Synthesis and crystal structure of bis(morpholino dithiocarbamato) Cd(II) complex and its use as precursor for CdS using different capping agents**

**Lebogang L. R. Mphahlele and Peter A. Ajibade***

School of Chemistry and Physics, University of KwaZulu-Natal, Private Bag X01, Scottsville, Pietermaritzburg, 3209 South Africa

**Figure S1:** IR spectra of morpholine ligand (L) and corresponding Cd(II) complex (C).


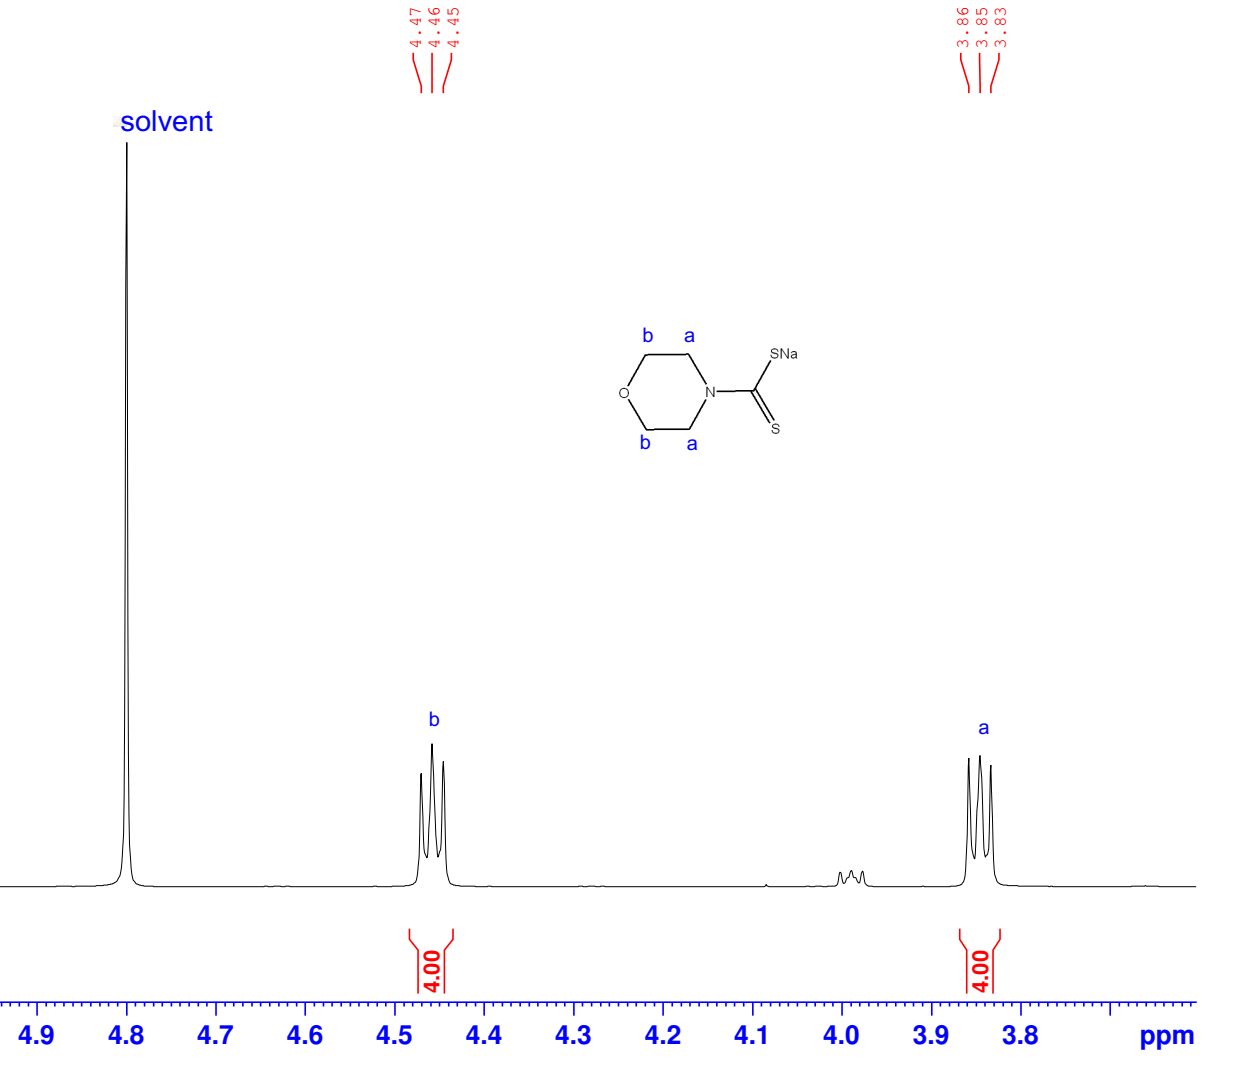

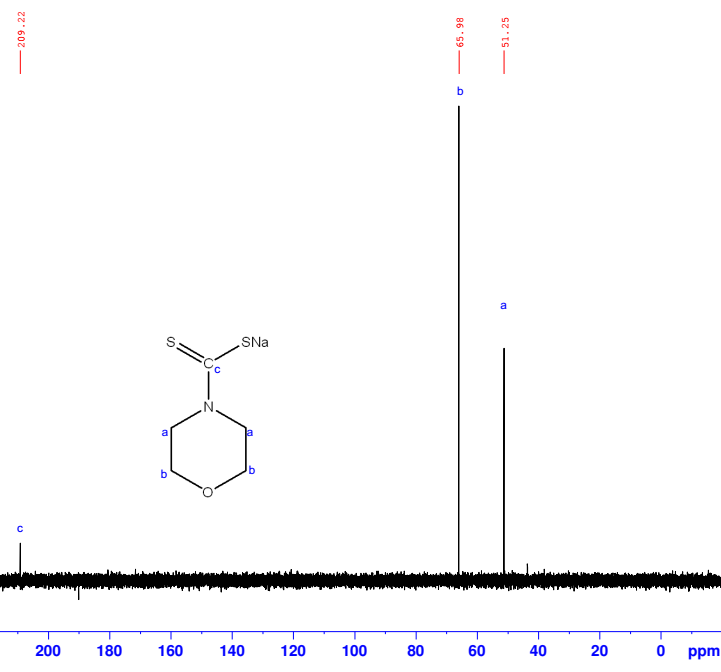


**Figure S2:** 1H & 13C NMR spectra of morpholine DTC ligand (L)


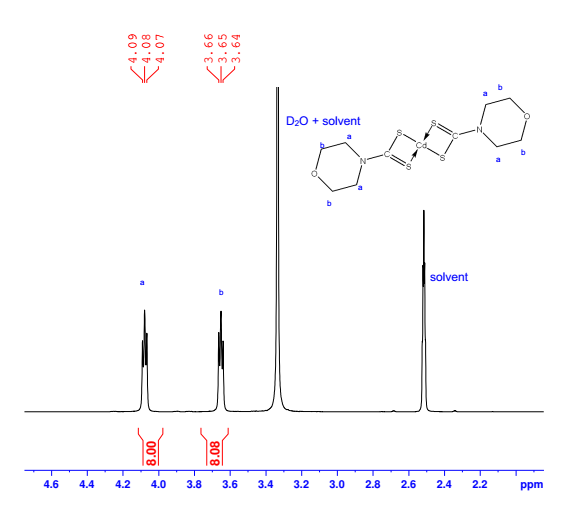

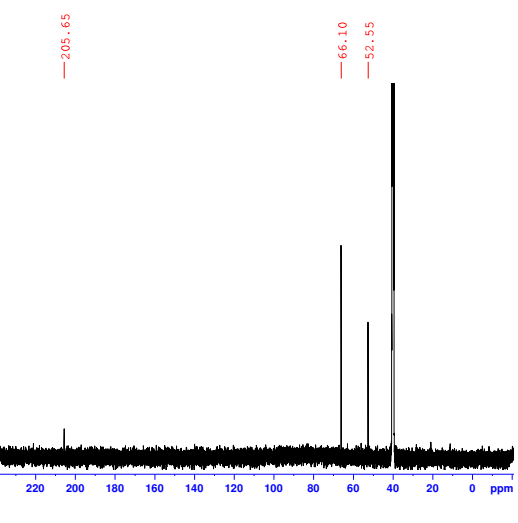


**Figure S3:** 1H & 13C NMR spectra of Cd(II)L DTC complex (C)


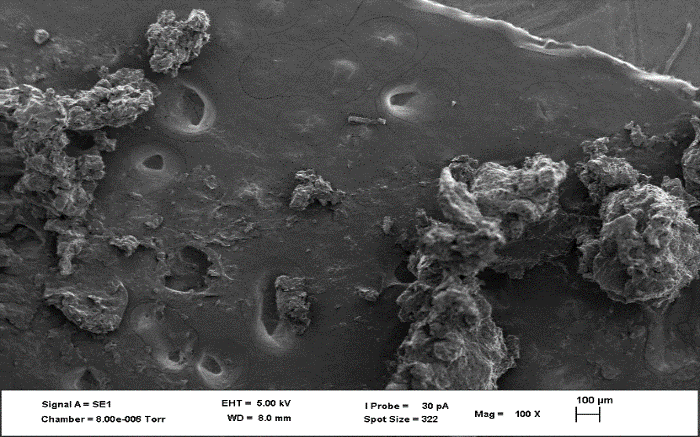

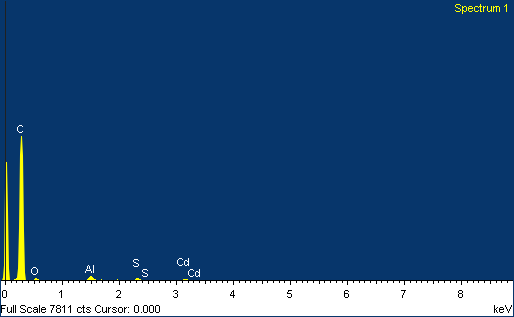
**(a)
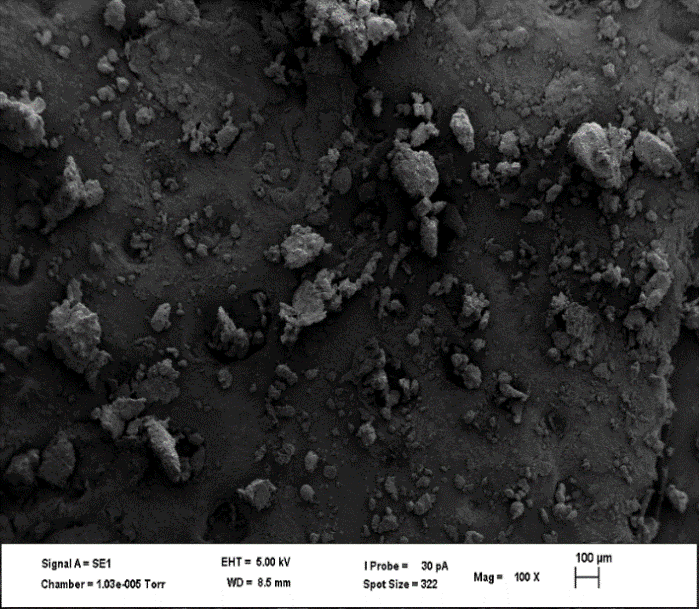
**
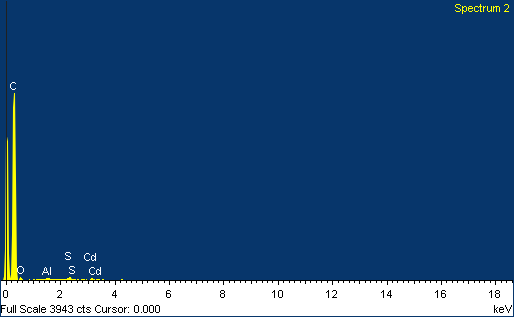
**(b)**
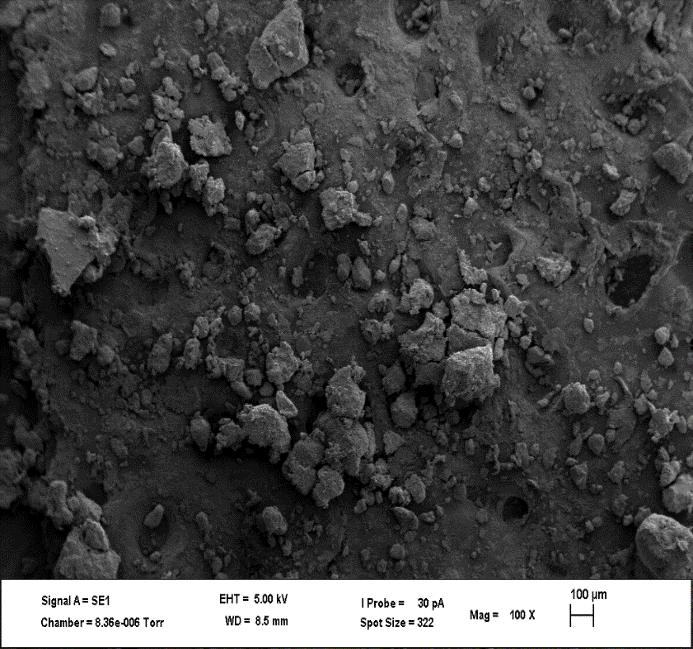

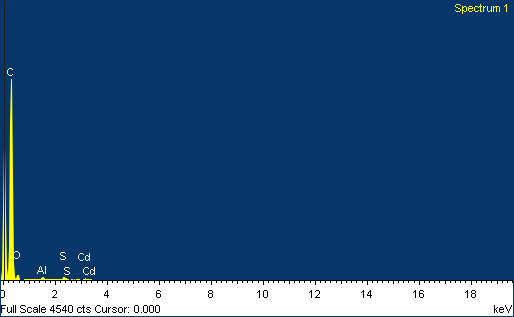
**(C)**

**Figure S4:** SEM micrographs and EDS spectra of as-prepared (OLM, HDA, and ODA) CdS nanoparticles
